# Supplementary material for: Genomic characterization of the Atlantic cod sex-locus
Source: PubMed Central journal article supplement (PMC4976360; doi:10.1038/srep31235), 2016-08-08
Supplement: srep31235-s1.pdf [file srep31235-s1.pdf]

## Supplementary Information

### Genomic characterization of the Atlantic cod sex-locus

Bastiaan Star<sup>1</sup>, Ole K. Tørresen<sup>1</sup>, Alexander J. Nederbragt<sup>1,2</sup>, Kjetill S. Jakobsen<sup>1</sup>,  
Christophe Pampoulie<sup>3</sup>, Sissel Jentoft<sup>1,4</sup>

<sup>1</sup> Centre for Ecological and Evolutionary Synthesis (CEES), Department of Biosciences,  
University of Oslo, PO Box 1066, Blindern, N-0316 Oslo, Norway.

<sup>2</sup> Research Group for Biomedical Informatics, Department of Informatics, University of Oslo,  
Oslo, Norway

<sup>3</sup> Marine Research Institute, Reykjavík, Iceland

<sup>4</sup> Department of Natural Sciences, University of Agder, Kristiansand, Norway

Corresponding author

Bastiaan Star ([bastiaan.star@ibv.uio.no](mailto:bastiaan.star@ibv.uio.no))

Keywords:

Sex-determination; sex-locus, sex-differentiation, Atlantic cod

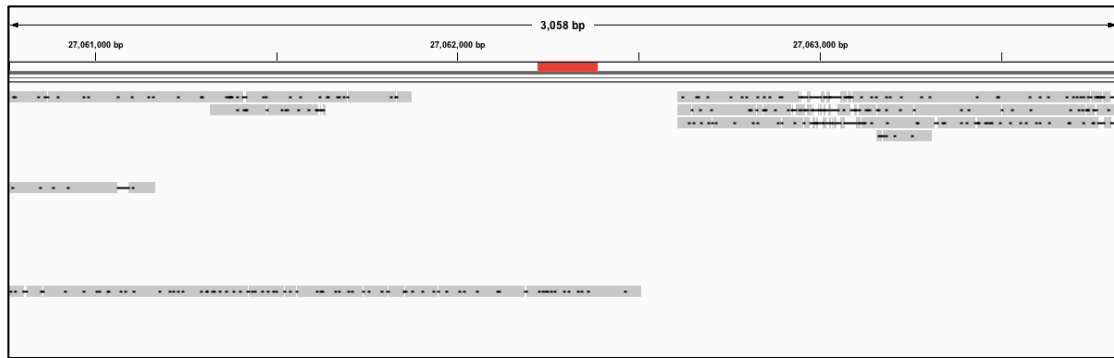

**Supplementary Figure 1.** PacBio read alignments of a female Atlantic cod specimen towards LG14. A single long read alignment (grey) overlaps the region containing sex-associated genotypes (red) on LG14. Small indels (black dots) within the reads are a typical feature of PacBio read data. Genomic positions are in base pair (bp). The figure is directly obtained by visualizing the read alignments using the Integrative Genomic Viewer (IGV).

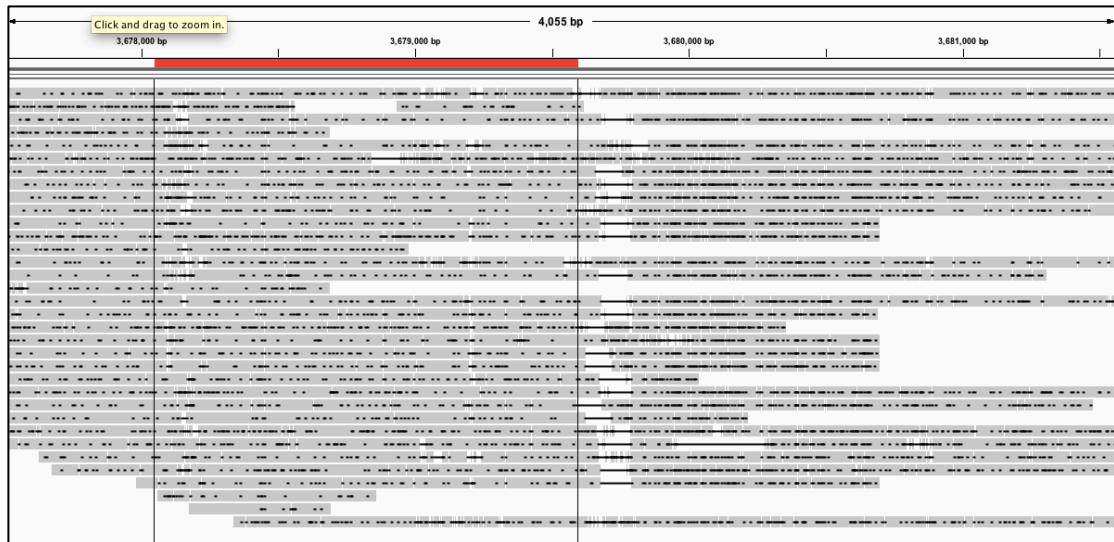

**Supplementary Figure 2.** PacBio read alignments of a female Atlantic cod specimen towards LG15. Long read alignments (grey) overlap the region containing sex-associated genotypes (red) on LG15. Small indels (black dots) within the reads are a typical feature of PacBio read data. Genomic positions are in base pair (bp). The figure is directly obtained by visualizing the read alignments using the Integrative Genomic Viewer (IGV).

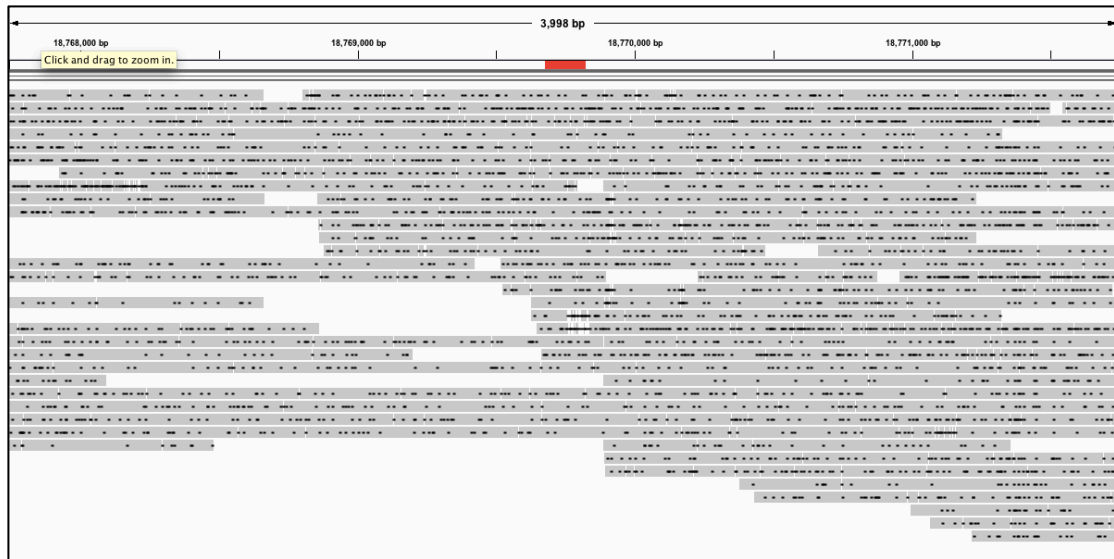

**Supplementary Figure 3.** PacBio read alignments of a female Atlantic cod specimen towards LG17. Long read alignments (grey) overlap the region containing sex-associated genotypes (red) on LG17. Small indels (black dots) within the reads are a typical feature of PacBio read data. Genomic positions are in base pair (bp). The figure is directly obtained by visualizing the read alignments using the Integrative Genomic Viewer (IGV).

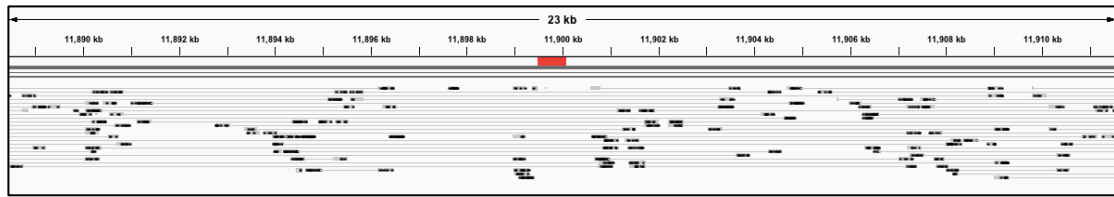

**Supplementary Figure 4.** Paired-end PacBio read alignments of a female Atlantic cod specimen towards LG11. Based on the full-length PacBio data of the female specimen, artificial paired-end reads were created with a length of 300 bp. The artificially created paired-end read alignments (grey lines) overlap the region (red) where their full-length equivalents fail to cross. Small indels (black dots) within the read ends are a typical feature of PacBio read data. Genomic positions are in kilobase pair (kb). The figure is directly obtained by visualizing the read alignments using the Integrative Genomic Viewer (IGV) and selecting the option “view as pairs”.

**Supplementary Table 1.** Location, sample name and sequencing depth for 179 Atlantic cod specimens. We predict sex based on measures of heterozygosity (F) of 13 polymorphic loci that are associated with gender in 48 Lofoten individuals. The number of homozygote (hom) and heterozygote (het) calls is shown. A single individual (AveroyaMarch1405) is misclassified based on the heterozygosity of these 13 loci.

| Location | Sample name | Sequencing |     |     | Recorded | Predicted | Prediction correct? |
|----------|-------------|------------|-----|-----|----------|-----------|---------------------|
|          |             | depth      | Hom | Het | Sex      | Sex       |                     |
| Iceland  | 150_02      | 9.9        | 2   | 11  | M        | M         | Y                   |
| Iceland  | 150_03      | 10.1       | 2   | 11  | M        | M         | Y                   |
| Iceland  | 150_04      | 9.6        | 2   | 11  | M        | M         | Y                   |
| Iceland  | 150_05      | 9.9        | 11  | 0   | F        | F         | Y                   |
| Iceland  | 150_06      | 9.1        | 9   | 2   | F        | F         | Y                   |
| Iceland  | 150_07      | 10.8       | 2   | 11  | M        | M         | Y                   |
| Iceland  | 150_08      | 10.8       | 3   | 10  | M        | M         | Y                   |
| Iceland  | 150_09      | 10.7       | 2   | 11  | M        | M         | Y                   |
| Iceland  | 150_10      | 9.1        | 2   | 11  | M        | M         | Y                   |
| Iceland  | 150_11      | 11.4       | 2   | 11  | M        | M         | Y                   |
| Iceland  | 150_12      | 18.5       | 2   | 10  | M        | M         | Y                   |
| Iceland  | 150_13      | 10.2       | 2   | 11  | M        | M         | Y                   |
| Iceland  | 150_14      | 9.7        | 11  | 0   | F        | F         | Y                   |
| Iceland  | 150_15      | 12.3       | 11  | 0   | F        | F         | Y                   |
| Iceland  | 150_16      | 10.8       | 4   | 9   | M        | M         | Y                   |
| Iceland  | 150_17      | 8.4        | 10  | 0   | F        | F         | Y                   |
| Iceland  | 150_18      | 9.4        | 11  | 0   | F        | F         | Y                   |
| Iceland  | 150_19      | 9.5        | 11  | 0   | F        | F         | Y                   |
| Iceland  | 150_20      | 5.1        | 2   | 11  | M        | M         | Y                   |
| Iceland  | 150_23      | 9.2        | 11  | 0   | F        | F         | Y                   |
| Iceland  | 150_41      | 9.9        | 11  | 0   | F        | F         | Y                   |
| Iceland  | 150_42      | 12.0       | 11  | 0   | F        | F         | Y                   |
| Averoya  | AVE_M_14_01 | 10.6       | 0   | 13  | M        | M         | Y                   |
| Averoya  | AVE_M_14_02 | 8.2        | 13  | 0   | F        | F         | Y                   |
| Averoya  | AVE_M_14_05 | 8.8        | 0   | 13  | F        | M         | N                   |
| Averoya  | AVE_M_14_06 | 9.8        | 13  | 0   | F        | F         | Y                   |
| Averoya  | AVE_M_14_07 | 8.6        | 0   | 13  | M        | M         | Y                   |
| Averoya  | AVE_M_14_09 | 9.6        | 11  | 0   | F        | F         | Y                   |
| Averoya  | AVE_M_14_10 | 11.0       | 4   | 9   | M        | M         | Y                   |
| Averoya  | AVE_M_14_13 | 12.7       | 0   | 13  | M        | M         | Y                   |
| Averoya  | AVE_M_14_16 | 10.6       | 0   | 13  | M        | M         | Y                   |
| Averoya  | AVE_M_14_17 | 10.3       | 13  | 0   | F        | F         | Y                   |
| Averoya  | AVE_M_14_18 | 8.9        | 13  | 0   | F        | F         | Y                   |
| Averoya  | AVE_M_14_19 | 10.1       | 0   | 13  | M        | M         | Y                   |
| Averoya  | AVE_M_14_20 | 9.3        | 13  | 0   | F        | F         | Y                   |
| Averoya  | AVE_M_14_21 | 9.8        | 11  | 0   | F        | F         | Y                   |
| Averoya  | AVE_M_14_22 | 10.6       | 2   | 11  | M        | M         | Y                   |
| Averoya  | AVE_M_14_24 | 10.2       | 13  | 0   | F        | F         | Y                   |
| Averoya  | AVE_M_14_25 | 10.9       | 13  | 0   | F        | F         | Y                   |
| Averoya  | AVE_M_14_26 | 23.3       | 2   | 11  | M        | M         | Y                   |
| Averoya  | AVE_M_14_30 | 8.4        | 1   | 12  | M        | M         | Y                   |
| Averoya  | AVE_M_14_31 | 9.5        | 2   | 11  | M        | M         | Y                   |
| Averoya  | AVE_M_14_32 | 43.0       | 5   | 8   | M        | M         | Y                   |
| Averoya  | AVE_M_14_33 | 10.4       | 0   | 13  | M        | M         | Y                   |
| Averoya  | AVE_M_14_35 | 10.6       | 0   | 13  | M        | M         | Y                   |
| Averoya  | AVE_M_14_37 | 11.6       | 2   | 11  | M        | M         | Y                   |
| Averoya  | AVE_M_14_38 | 10.5       | 3   | 10  | M        | M         | Y                   |
| Averoya  | AVE_M_14_39 | 12.8       | 13  | 0   | F        | F         | Y                   |
| Averoya  | AVE_M_14_40 | 8.8        | 13  | 0   | F        | F         | Y                   |
| Averoya  | AVE_M_14_41 | 9.4        | 0   | 13  | M        | M         | Y                   |
| Averoya  | AVE_M_14_42 | 9.1        | 10  | 3   | F        | F         | Y                   |
| Averoya  | AVE_M_14_43 | 11.6       | 0   | 13  | M        | M         | Y                   |
| Averoya  | AVE_M_14_44 | 9.7        | 11  | 0   | F        | F         | Y                   |
| Averoya  | AVE_M_14_45 | 13.3       | 2   | 11  | M        | M         | Y                   |
| Averoya  | AVE_M_14_46 | 11.2       | 13  | 0   | F        | F         | Y                   |
| Averoya  | AVE_M_14_47 | 12.6       | 13  | 0   | F        | F         | Y                   |
| Averoya  | AVE_M_14_48 | 9.1        | 13  | 0   | F        | F         | Y                   |
| Averoya  | AVE_S_14_01 | 9.9        | 0   | 13  | M        | M         | Y                   |
| Averoya  | AVE_S_14_02 | 9.7        | 13  | 0   | F        | F         | Y                   |
| Averoya  | AVE_S_14_05 | 11.2       | 0   | 13  | M        | M         | Y                   |
| Averoya  | AVE_S_14_08 | 7.8        | 13  | 0   | F        | F         | Y                   |
| Averoya  | AVE_S_14_11 | 8.5        | 13  | 0   | F        | F         | Y                   |
| Averoya  | AVE_S_14_14 | 8.1        | 4   | 9   | M        | M         | Y                   |

|         |              |      |    |    |   |   |    |
|---------|--------------|------|----|----|---|---|----|
| Averoya | AVE_S_14_17  | 8.4  | 3  | 10 | M | M | Y  |
| Averoya | AVE_S_14_19  | 9.7  | 0  | 13 | M | M | Y  |
| Averoya | AVE_S_14_21  | 9.5  | 11 | 0  | F | F | Y  |
| Averoya | AVE_S_14_22  | 4.9  | 3  | 10 | M | M | Y  |
| Averoya | AVE_S_14_23  | 9.6  | 0  | 13 | M | M | Y  |
| Averoya | AVE_S_14_24  | 8.4  | 13 | 0  | F | F | Y  |
| Averoya | AVE_S_14_25  | 9.7  | 11 | 0  | F | F | Y  |
| Averoya | AVE_S_14_27  | 11.8 | 0  | 12 | M | M | Y  |
| Averoya | AVE_S_14_30  | 8.9  | 13 | 0  | F | F | Y  |
| Averoya | AVE_S_14_32  | 9.4  | 1  | 12 | M | M | Y  |
| Averoya | AVE_S_14_33  | 8.9  | 0  | 13 | M | M | Y  |
| Averoya | AVE_S_14_34  | 9.5  | 1  | 12 | M | M | Y  |
| Averoya | AVE_S_14_35  | 9.4  | 13 | 0  | F | F | Y  |
| Averoya | AVE_S_14_37  | 9.2  | 0  | 13 | M | M | Y  |
| Averoya | AVE_S_14_38  | 7.8  | 11 | 0  | F | F | Y  |
| Averoya | AVE_S_14_39  | 9.2  | 0  | 13 | M | M | Y  |
| Averoya | AVE_S_14_41  | 8.7  | 1  | 12 | M | M | Y  |
| Averoya | AVE_S_14_43  | 12.2 | 13 | 0  | F | F | Y  |
| Lofoten | LOF_Y_11_007 | 7.9  | 10 | 3  | F | . | Na |
| Lofoten | LOF_Y_11_009 | 9.7  | 13 | 0  | F | . | Na |
| Lofoten | LOF_Y_11_013 | 9.7  | 0  | 13 | M | . | Na |
| Lofoten | LOF_Y_11_015 | 9.0  | 0  | 13 | M | . | Na |
| Lofoten | LOF_Y_11_017 | 10.3 | 0  | 11 | M | . | Na |
| Lofoten | LOF_Y_11_019 | 8.3  | 13 | 0  | F | . | Na |
| Lofoten | LOF_Y_11_021 | 9.9  | 13 | 0  | F | . | Na |
| Lofoten | LOF_Y_11_029 | 10.4 | 1  | 12 | M | . | Na |
| Lofoten | LOF_Y_11_039 | 9.2  | 13 | 0  | F | . | Na |
| Lofoten | LOF_Y_11_041 | 10.4 | 1  | 12 | M | . | Na |
| Lofoten | LOF_Y_11_043 | 8.8  | 13 | 0  | F | . | Na |
| Lofoten | LOF_Y_11_045 | 7.9  | 12 | 1  | F | . | Na |
| Lofoten | LOF_Y_11_049 | 8.9  | 0  | 13 | M | . | Na |
| Lofoten | LOF_Y_11_141 | 9.8  | 13 | 0  | F | . | Na |
| Lofoten | LOF_Y_11_143 | 10.0 | 13 | 0  | F | . | Na |
| Lofoten | LOF_Y_11_145 | 8.7  | 1  | 12 | M | . | Na |
| Lofoten | LOF_Y_11_147 | 9.8  | 12 | 0  | F | . | Na |
| Lofoten | LOF_Y_11_149 | 9.0  | 13 | 0  | F | . | Na |
| Lofoten | LOF_Y_11_151 | 9.0  | 12 | 0  | F | . | Na |
| Lofoten | LOF_Y_11_153 | 7.3  | 13 | 0  | F | . | Na |
| Lofoten | LOF_Y_11_155 | 10.5 | 13 | 0  | F | . | Na |
| Lofoten | LOF_Y_11_159 | 7.8  | 13 | 0  | F | . | Na |
| Lofoten | LOF_Y_11_161 | 11.2 | 13 | 0  | F | . | Na |
| Lofoten | LOF_Y_11_163 | 9.8  | 0  | 13 | M | . | Na |
| Lofoten | LOF_I_11_01  | 9.5  | 13 | 0  | F | . | Na |
| Lofoten | LOF_I_11_03  | 8.8  | 1  | 12 | M | . | Na |
| Lofoten | LOF_I_11_04  | 12.4 | 0  | 13 | M | . | Na |
| Lofoten | LOF_I_11_05  | 11.5 | 11 | 2  | F | . | Na |
| Lofoten | LOF_I_11_07  | 10.3 | 0  | 13 | M | . | Na |
| Lofoten | LOF_I_11_08  | 10.1 | 13 | 0  | F | . | Na |
| Lofoten | LOF_I_11_09  | 10.4 | 13 | 0  | F | . | Na |
| Lofoten | LOF_I_11_10  | 12.0 | 13 | 0  | F | . | Na |
| Lofoten | LOF_I_11_11  | 11.3 | 0  | 13 | M | . | Na |
| Lofoten | LOF_I_11_12  | 13.9 | 0  | 11 | M | . | Na |
| Lofoten | LOF_I_11_13  | 11.7 | 13 | 0  | F | . | Na |
| Lofoten | LOF_I_11_14  | 9.7  | 13 | 0  | F | . | Na |
| Lofoten | LOF_I_11_15  | 8.6  | 13 | 0  | F | . | Na |
| Lofoten | LOF_I_11_16  | 10.1 | 13 | 0  | F | . | Na |
| Lofoten | LOF_I_11_17  | 9.9  | 1  | 12 | M | . | Na |
| Lofoten | LOF_I_11_18  | 9.8  | 0  | 13 | M | . | Na |
| Lofoten | LOF_I_11_21  | 11.6 | 1  | 12 | M | . | Na |
| Lofoten | LOF_I_11_22  | 9.5  | 12 | 1  | F | . | Na |
| Lofoten | LOF_I_11_23  | 10.0 | 0  | 13 | M | . | Na |
| Lofoten | LOF_I_11_24  | 8.8  | 13 | 0  | F | . | Na |
| Lofoten | LOF_I_11_29  | 12.3 | 0  | 13 | M | . | Na |
| Lofoten | LOF_I_11_34  | 10.8 | 1  | 12 | M | . | Na |
| Lofoten | LOF_I_11_35  | 10.3 | 0  | 13 | M | . | Na |
| Lofoten | LOF_I_11_36  | 10.1 | 0  | 13 | M | . | Na |
| Lofoten | LOF_A_14_01  | 11.4 | 2  | 11 | M | M | Y  |
| Lofoten | LOF_A_14_03  | 9.9  | 11 | 0  | F | F | Y  |
| Lofoten | LOF_A_14_04  | 9.7  | 2  | 11 | F | F | Y  |
| Lofoten | LOF_A_14_05  | 39.7 | 12 | 1  | F | F | Y  |
| Lofoten | LOF_A_14_06  | 10.2 | 0  | 13 | F | F | Y  |
| Lofoten | LOF_A_14_08  | 9.7  | 13 | 0  | F | F | Y  |
| Lofoten | LOF_A_14_09  | 10.3 | 13 | 0  | F | F | Y  |
| Lofoten | LOF_A_14_10  | 10.7 | 3  | 10 | F | F | Y  |
| Lofoten | LOF_A_14_11  | 10.0 | 0  | 13 | M | M | Y  |

|         |             |      |    |    |   |   |   |
|---------|-------------|------|----|----|---|---|---|
| Lofoten | LOF_A_14_16 | 10.1 | 2  | 11 | F | F | Y |
| Lofoten | LOF_A_14_17 | 11.3 | 13 | 0  | F | F | Y |
| Lofoten | LOF_A_14_18 | 12.4 | 2  | 11 | M | M | Y |
| Lofoten | LOF_A_14_19 | 12.5 | 13 | 0  | F | F | Y |
| Lofoten | LOF_A_14_20 | 9.8  | 11 | 0  | M | M | Y |
| Lofoten | LOF_A_14_21 | 8.9  | 0  | 13 | M | M | Y |
| Lofoten | LOF_A_14_22 | 9.5  | 11 | 0  | M | M | Y |
| Lofoten | LOF_A_14_23 | 9.9  | 11 | 0  | F | F | Y |
| Lofoten | LOF_A_14_24 | 10.6 | 11 | 0  | F | F | Y |
| Lofoten | LOF_A_14_25 | 10.6 | 11 | 0  | M | M | Y |
| Lofoten | LOF_A_14_26 | 12.8 | 11 | 0  | F | F | Y |
| Lofoten | LOF_A_14_27 | 11.5 | 11 | 0  | M | M | Y |
| Lofoten | LOF_A_14_28 | 10.5 | 13 | 0  | F | F | Y |
| Lofoten | LOF_A_14_29 | 10.0 | 2  | 11 | M | M | Y |
| Lofoten | LOF_A_14_30 | 11.1 | 5  | 8  | M | M | Y |
| Lofoten | LOF_A_14_33 | 10.2 | 0  | 13 | M | M | Y |
| Lofoten | LOF_A_14_41 | 10.5 | 0  | 13 | M | M | Y |
| Lofoten | LOF_M_14_26 | 11.6 | 11 | 0  | F | F | Y |
| Lofoten | LOF_M_14_27 | 13.6 | 13 | 0  | F | F | Y |
| Lofoten | LOF_M_14_28 | 12.5 | 0  | 13 | M | M | Y |
| Lofoten | LOF_M_14_29 | 11.2 | 2  | 11 | M | M | Y |
| Lofoten | LOF_M_14_30 | 11.1 | 11 | 0  | F | F | Y |
| Lofoten | LOF_M_14_31 | 11.8 | 0  | 13 | M | M | Y |
| Lofoten | LOF_M_14_32 | 8.1  | 0  | 13 | M | M | Y |
| Lofoten | LOF_M_14_33 | 10.8 | 13 | 0  | F | F | Y |
| Lofoten | LOF_M_14_35 | 8.7  | 11 | 0  | F | F | Y |
| Lofoten | LOF_M_14_36 | 12.8 | 11 | 0  | F | F | Y |
| Lofoten | LOF_M_14_43 | 11.1 | 0  | 13 | M | M | Y |
| Lofoten | LOF_M_14_44 | 12.8 | 11 | 0  | F | F | Y |
| Lofoten | LOF_M_14_45 | 10.1 | 0  | 13 | M | M | Y |
| Lofoten | LOF_M_14_46 | 12.5 | 13 | 0  | F | F | Y |
| Lofoten | LOF_M_14_47 | 6.6  | 13 | 0  | F | F | Y |
| Lofoten | LOF_M_14_50 | 10.8 | 11 | 0  | F | F | Y |
| Lofoten | LOF_M_14_51 | 12.7 | 13 | 0  | F | F | Y |
| Lofoten | LOF_M_14_52 | 11.1 | 13 | 0  | F | F | Y |
| Lofoten | LOF_M_14_53 | 11.6 | 13 | 0  | F | F | Y |
| Lofoten | LOF_M_14_54 | 13.1 | 2  | 11 | M | M | Y |
| Lofoten | LOF_M_14_55 | 13.7 | 0  | 13 | M | M | Y |
| Lofoten | LOF_M_14_56 | 15.3 | 0  | 13 | M | M | Y |
| Lofoten | LOF_M_14_62 | 10.6 | 0  | 13 | M | M | Y |
| Lofoten | LOF_M_14_68 | 13.7 | 0  | 13 | M | M | Y |
| Sorøya  | SOR_M_14_06 | 14.8 | 0  | 13 | M | M | Y |
| Sorøya  | SOR_M_14_07 | 11.7 | 2  | 11 | M | M | Y |
| Sorøya  | SOR_M_14_09 | 9.1  | 11 | 0  | F | F | Y |
| Sorøya  | SOR_M_14_10 | 9.3  | 0  | 13 | M | M | Y |
| Sorøya  | SOR_M_14_11 | 9.6  | 1  | 12 | M | M | Y |
| Sorøya  | SOR_M_14_12 | 10.0 | 2  | 11 | M | M | Y |
| Sorøya  | SOR_M_14_14 | 12.2 | 0  | 13 | M | M | Y |
| Sorøya  | SOR_M_14_15 | 11.6 | 3  | 10 | M | M | Y |
| Sorøya  | SOR_M_14_16 | 11.6 | 13 | 0  | F | F | Y |
| Sorøya  | SOR_M_14_17 | 10.4 | 0  | 13 | M | M | Y |
| Sorøya  | SOR_M_14_19 | 10.2 | 11 | 0  | F | F | Y |
| Sorøya  | SOR_M_14_38 | 10.0 | 11 | 0  | F | F | Y |
| Sorøya  | SOR_M_14_39 | 11.3 | 11 | 0  | F | F | Y |
| Sorøya  | SOR_M_14_40 | 10.5 | 11 | 0  | F | F | Y |
| Sorøya  | SOR_M_14_41 | 12.8 | 11 | 0  | F | F | Y |
| Sorøya  | SOR_M_14_42 | 11.8 | 0  | 13 | M | M | Y |
| Sorøya  | SOR_M_14_43 | 11.5 | 13 | 0  | F | F | Y |
| Sorøya  | SOR_M_14_44 | 20.7 | 10 | 1  | F | F | Y |
| Sorøya  | SOR_M_14_45 | 11.8 | 11 | 0  | F | F | Y |
| Sorøya  | SOR_M_14_46 | 11.8 | 13 | 0  | F | F | Y |
| Sorøya  | SOR_M_14_47 | 11.1 | 4  | 9  | M | M | Y |
| Sorøya  | SOR_M_14_48 | 14.0 | 13 | 0  | F | F | Y |
| Sorøya  | SOR_M_14_49 | 11.3 | 2  | 11 | M | M | Y |
| Sorøya  | SOR_M_14_50 | 13.0 | 11 | 0  | F | F | Y |
| Sorøya  | SOR_S_13_39 | 9.8  | 12 | 0  | F | F | Y |
| Sorøya  | SOR_S_13_40 | 10.6 | 2  | 11 | M | M | Y |
| Sorøya  | SOR_S_13_42 | 10.9 | 2  | 11 | M | M | Y |
| Sorøya  | SOR_S_13_45 | 14.7 | 13 | 0  | F | F | Y |
| Sorøya  | SOR_S_13_46 | 11.4 | 0  | 13 | M | M | Y |
| Sorøya  | SOR_S_13_49 | 13.3 | 2  | 11 | M | M | Y |
| Sorøya  | SOR_S_13_50 | 11.0 | 0  | 13 | M | M | Y |
| Sorøya  | SOR_S_13_52 | 10.8 | 13 | 0  | F | F | Y |
| Sorøya  | SOR_S_13_53 | 10.7 | 11 | 0  | F | F | Y |
| Sorøya  | SOR_S_13_54 | 11.5 | 11 | 0  | F | F | Y |



|        |             |      |    |    |   |   |   |
|--------|-------------|------|----|----|---|---|---|
| Sorøya | SOR_S_13_55 | 10.0 | 13 | 0  | F | F | Y |
| Sorøya | SOR_S_13_56 | 12.1 | 11 | 0  | F | F | Y |
| Sorøya | SOR_S_13_59 | 11.8 | 2  | 11 | M | M | Y |
| Sorøya | SOR_S_13_64 | 14.0 | 13 | 0  | F | F | Y |
| Sorøya | SOR_S_13_66 | 12.0 | 13 | 0  | F | F | Y |
| Sorøya | SOR_S_13_67 | 11.8 | 0  | 13 | M | M | Y |
| Sorøya | SOR_S_13_69 | 11.1 | 0  | 13 | M | M | Y |
| Sorøya | SOR_S_13_71 | 11.2 | 0  | 13 | M | M | Y |
| Sorøya | SOR_S_13_72 | 9.7  | 13 | 0  | F | F | Y |
| Sorøya | SOR_S_13_76 | 11.7 | 0  | 13 | M | M | Y |
| Sorøya | SOR_S_13_78 | 10.7 | 11 | 0  | F | F | Y |
| Sorøya | SOR_S_13_79 | 10.5 | 0  | 13 | M | M | Y |
| Sorøya | SOR_S_13_81 | 12.0 | 13 | 0  | F | F | Y |
| Sorøya | SOR_S_13_85 | 13.4 | 13 | 0  | F | F | Y |

**Supplementary Table 2.** Position, allelic and genotypic composition of sex-linked loci with  $p$ -values at least six Standard Deviation (SD) away from the mean.  $P$ -values were calculated comparing genotypes of Atlantic cod females and males using Fisher's exact test. Values are  $-\log$  transformed and loci are sorted according to  $p$ -value.

| LG   | Position | Allele    |             | Genotype ( <i>ref.het.alt</i> ) |          | $-\log(p)$ |
|------|----------|-----------|-------------|---------------------------------|----------|------------|
|      |          | Reference | Alternative | Females                         | Males    |            |
| LG11 | 11888434 | T         | C           | 114.0.0                         | 2.109.1  | 66.7228    |
| LG11 | 11897471 | G         | GTGT        | 0.0.114                         | 2.107.3  | 64.6546    |
| LG11 | 11897519 | A         | T           | 0.0.114                         | 2.107.3  | 64.6546    |
| LG11 | 11895561 | G         | C           | 0.0.113                         | 7.102.3  | 64.3687    |
| LG11 | 11897588 | T         | G           | 0.0.113                         | 5.102.3  | 63.745     |
| LG11 | 11897566 | AATCC     | A           | 0.1.111                         | 2.106.2  | 63.4844    |
| LG11 | 11897513 | C         | T           | 0.0.114                         | 2.106.4  | 62.8837    |
| LG11 | 11886873 | T         | A           | 0.1.113                         | 3.106.3  | 62.6169    |
| LG11 | 11885753 | G         | T           | 0.2.110                         | 4.105.2  | 62.0163    |
| LG11 | 11899391 | C         | CT          | 0.2.112                         | 0.109.3  | 60.8761    |
| LG11 | 11899196 | G         | T           | 0.1.113                         | 0.107.5  | 59.2628    |
| LG11 | 11897286 | CAA       | C           | 0.1.111                         | 29.70.3  | 58.9017    |
| LG11 | 11899495 | T         | C           | 0.0.87                          | 38.71.2  | 57.9197    |
| LG11 | 11899188 | A         | G           | 0.1.113                         | 0.106.6  | 57.7934    |
| LG11 | 11899373 | T         | A           | 0.1.113                         | 0.105.7  | 56.4171    |
| LG11 | 11884677 | T         | TTTCGGGGTC  | 0.4.110                         | 9.98.2   | 55.4612    |
| LG11 | 11899487 | C         | A           | 0.1.84                          | 38.71.2  | 55.1811    |
| LG11 | 11884313 | G         | A           | 0.6.108                         | 4.105.3  | 54.759     |
| LG11 | 11893931 | G         | A           | 0.0.113                         | 4.98.10  | 54.4203    |
| LG11 | 11893943 | A         | G           | 0.0.113                         | 3.99.10  | 54.4203    |
| LG11 | 11893118 | T         | A           | 114.0.0                         | 10.99.2  | 54.3683    |
| LG11 | 11899288 | A         | C           | 0.0.114                         | 0.101.11 | 53.5384    |
| LG11 | 11899355 | C         | A           | 0.0.114                         | 0.101.11 | 53.5384    |
| LG11 | 11899434 | T         | TTA         | 0.1.81                          | 28.81.1  | 53.4522    |
| LG11 | 11899440 | C         | A           | 0.1.81                          | 26.80.1  | 53.0224    |
| LG11 | 11899305 | C         | G           | 114.0.0                         | 12.100.0 | 52.4379    |
| LG11 | 11899306 | G         | A           | 114.0.0                         | 12.100.0 | 52.4379    |
| LG11 | 11900583 | T         | G           | 2.1.97                          | 43.64.5  | 52.0255    |
| LG11 | 11899287 | C         | G           | 0.1.113                         | 0.101.11 | 51.5618    |
| LG11 | 11890528 | T         | TA          | 114.0.0                         | 13.98.1  | 51.3755    |
| LG11 | 11890530 | C         | G           | 114.0.0                         | 13.98.1  | 51.3755    |
| LG11 | 11890531 | T         | A           | 114.0.0                         | 13.98.1  | 51.3755    |
| LG11 | 11892971 | A         | G           | 114.0.0                         | 13.98.1  | 51.3755    |
| LG11 | 11899309 | T         | C           | 114.0.0                         | 13.99.0  | 51.3755    |
| LG11 | 11900627 | T         | A           | 3.2.100                         | 37.70.5  | 51.022     |
| LG11 | 11899344 | A         | C           | 114.0.0                         | 14.98.0  | 50.3476    |
| LG11 | 11887720 | C         | T           | 0.2.112                         | 5.95.11  | 49.4487    |
| LG08 | 1784612  | G         | C           | 114.0.0                         | 17.95.0  | 47.4419    |
| LG11 | 11899539 | G         | T           | 0.3.69                          | 37.72.1  | 46.9034    |
| LG11 | 11897239 | C         | T           | 0.0.112                         | 25.63.15 | 46.0074    |
| LG11 | 11899548 | TA        | T           | 0.3.69                          | 37.71.2  | 45.059     |
| LG11 | 11899455 | C         | G           | 0.1.61                          | 62.39.1  | 44.3422    |
| LG11 | 11899456 | C         | T           | 0.1.61                          | 62.39.1  | 44.3422    |
| LG11 | 11892844 | G         | A           | 114.0.0                         | 21.84.6  | 43.5959    |
| LG08 | 1784766  | A         | C           | 114.0.0                         | 24.88.0  | 41.4642    |
| LG11 | 11900496 | A         | C           | 2.1.55                          | 81.29.1  | 40.9179    |
| LG15 | 3678047  | G         | A           | 114.0.0                         | 25.87.0  | 40.6828    |
| LG11 | 11899462 | A         | G           | 0.1.52                          | 68.32.1  | 40.6381    |
| LG11 | 11897211 | G         | A           | 0.1.110                         | 20.63.19 | 39.9097    |
| LG11 | 11899589 | A         | G           | 1.4.58                          | 56.48.2  | 38.2237    |
| LG11 | 11899590 | T         | C           | 1.4.58                          | 56.48.2  | 38.2237    |
| LG11 | 11897256 | G         | T           | 106.0.0                         | 19.65.10 | 38.0784    |

|      |          |           |     |          |          |         |
|------|----------|-----------|-----|----------|----------|---------|
| LG11 | 11882114 | G         | A   | 1.12.101 | 8.91.12  | 35.8416 |
| LG11 | 11882397 | A         | G   | 1.11.102 | 11.87.14 | 34.8153 |
| LG11 | 11868892 | A         | G   | 0.7.107  | 8.82.22  | 33.0032 |
| LG11 | 11882972 | A         | G   | 100.14.0 | 15.92.4  | 32.2323 |
| LG11 | 11866841 | T         | A   | 108.6.0  | 26.85.1  | 31.5318 |
| LG11 | 11881590 | CAAA      | C   | 102.12.0 | 18.89.5  | 31.5233 |
| LG11 | 11878389 | C         | A   | 101.13.0 | 17.91.4  | 31.4947 |
| LG11 | 11878390 | A         | T   | 101.13.0 | 17.91.4  | 31.4947 |
| LG11 | 11882191 | G         | C   | 1.12.101 | 6.89.17  | 31.4544 |
| LG11 | 11879920 | C         | G   | 106.8.0  | 24.78.10 | 30.5634 |
| LG15 | 3678509  | C         | T   | 113.1.0  | 38.72.2  | 29.9292 |
| LG11 | 11897888 | C         | T   | 0.0.29   | 82.27.0  | 29.734  |
| LG11 | 11893394 | G         | T   | 113.0.0  | 32.52.6  | 28.0626 |
| LG11 | 11896849 | A         | T   | 111.0.0  | 30.49.8  | 28.053  |
| LG11 | 11871538 | G         | A   | 0.14.100 | 10.81.21 | 27.6979 |
| LG11 | 11897183 | AT        | A   | 113.0.0  | 35.51.5  | 26.4359 |
| LG11 | 11897094 | T         | G   | 0.0.45   | 55.10.6  | 26.3407 |
| LG17 | 18769711 | G         | A   | 113.1.0  | 45.67.0  | 25.8671 |
| LG08 | 1784400  | A         | G   | 114.0.0  | 50.62.0  | 24.8303 |
| LG08 | 1784404  | A         | G   | 114.0.0  | 50.62.0  | 24.8303 |
| LG08 | 1784429  | ACGAT     | A   | 109.0.0  | 51.60.0  | 23.3098 |
| LG08 | 1784813  | G         | T   | 114.0.0  | 53.59.0  | 23.2669 |
| LG11 | 11897743 | GGTACTAAA | G   | 0.0.20   | 84.24.0  | 23.0779 |
| LG11 | 11878698 | A         | G   | 105.7.0  | 35.62.10 | 22.7238 |
| LG11 | 11897815 | AATC      | A   | 4.0.26   | 82.26.2  | 22.6057 |
| LG11 | 11897935 | G         | C   | 0.0.19   | 84.25.0  | 22.3415 |
| LG14 | 27062326 | G         | A   | 114.0.0  | 54.56.0  | 22.1301 |
| LG15 | 3678607  | A         | G   | 114.0.0  | 56.54.1  | 21.4432 |
| LG11 | 11879620 | A         | G   | 2.9.99   | 27.42.26 | 21.4195 |
| LG11 | 11897771 | ATAAATG   | A   | 0.1.20   | 84.23.1  | 21.163  |
| LG11 | 11877918 | G         | C   | 100.8.2  | 27.48.19 | 21.0144 |
| LG11 | 11870831 | T         | C   | 109.5.0  | 45.66.1  | 20.9439 |
| LG08 | 1784804  | G         | A   | 113.1.0  | 54.58.0  | 20.9355 |
| LG11 | 11902824 | TTTTTC    | T   | 0.36.78  | 11.88.13 | 20.7918 |
| LG11 | 11897795 | ATAAAAGTG | A   | 1.0.26   | 39.25.2  | 20.4024 |
| LG11 | 11864114 | A         | G   | 0.9.105  | 5.68.39  | 20.309  |
| LG17 | 18769822 | G         | A   | 114.0.0  | 59.53.0  | 20.2937 |
| LG11 | 11895278 | A         | G   | 112.0.0  | 38.38.3  | 19.9187 |
| LG11 | 11897835 | A         | G   | 6.2.26   | 82.24.2  | 19.7014 |
| LG11 | 11887941 | A         | T   | 19.35.57 | 54.55.2  | 19.6578 |
| LG11 | 11896785 | T         | G   | 104.0.0  | 37.32.10 | 19.6572 |
| LG11 | 11864338 | A         | C   | 106.8.0  | 42.67.2  | 19.4949 |
| LG14 | 27062388 | C         | A   | 114.0.0  | 61.51.0  | 19.3444 |
| LG08 | 24118823 | A         | AG  | 27.0.0   | 6.19.54  | 19.0263 |
| LG11 | 11898436 | C         | G   | 11.53.50 | 34.0.77  | 18.766  |
| LG15 | 3678560  | T         | G   | 113.0.0  | 58.47.1  | 18.7615 |
| LG11 | 11884987 | A         | C   | 14.48.52 | 45.66.1  | 17.4012 |
| LG15 | 3679388  | G         | T   | 88.0.0   | 41.31.12 | 17.2651 |
| LG11 | 11885065 | T         | A   | 17.44.53 | 47.64.1  | 17.2547 |
| LG17 | 18769676 | G         | A   | 114.0.0  | 66.46.0  | 17.0538 |
| LG11 | 11898609 | A         | G   | 59.47.8  | 78.0.31  | 16.9876 |
| LG11 | 11897878 | T         | TGC | 8.1.20   | 86.23.0  | 16.5674 |
| LG11 | 11898425 | C         | T   | 62.45.7  | 71.2.38  | 16.1478 |
| LG08 | 1784756  | T         | C   | 67.47.0  | 12.100.0 | 15.6388 |
| LG11 | 11897905 | C         | A   | 7.1.18   | 89.21.0  | 15.4019 |
| LG11 | 11904163 | T         | G   | 0.1.110  | 6.39.66  | 14.6938 |
| LG15 | 3679415  | G         | A   | 91.0.0   | 50.21.17 | 14.479  |
| LG08 | 24118567 | G         | A   | 59.0.0   | 30.22.22 | 14.3576 |
| LG11 | 11886135 | C         | T   | 41.57.16 | 1.58.53  | 14.1749 |
| LG08 | 24118576 | G         | T   | 58.0.0   | 30.22.21 | 13.9087 |

|      |          |             |     |          |          |         |
|------|----------|-------------|-----|----------|----------|---------|
| LG15 | 3679605  | C           | A   | 80.0.0   | 36.12.19 | 12.9851 |
| LG11 | 11897873 | ACC         | A   | 23.1.20  | 89.23.0  | 12.8292 |
| LG11 | 11898639 | A           | G   | 1.30.82  | 17.0.87  | 12.1666 |
| LG11 | 11907860 | A           | G   | 0.2.112  | 3.38.70  | 12.0979 |
| LG08 | 24118529 | A           | C   | 47.0.0   | 24.12.23 | 12.0024 |
| LG11 | 11880247 | C           | G   | 111.3.0  | 69.41.2  | 11.8719 |
| LG11 | 11894953 | TGCAGGCAGGG | T   | 81.23.4  | 32.46.29 | 11.8586 |
| LG15 | 3679348  | A           | C   | 72.1.0   | 39.17.18 | 11.6158 |
| LG08 | 24118864 | T           | TAA | 27.0.1   | 13.12.38 | 11.3835 |
| LG11 | 11904283 | T           | C   | 0.3.104  | 12.27.59 | 11.3144 |
| LG08 | 1784577  | C           | A   | 0.70.44  | 2.104.5  | 11.0058 |
| LG14 | 27062221 | C           | T   | 99.15.0  | 51.61.0  | 10.9763 |
| LG15 | 3679330  | T           | C   | 68.0.0   | 39.11.18 | 10.6313 |
| LG11 | 11869268 | C           | A   | 110.4.0  | 71.40.1  | 10.2406 |
| LG11 | 11898204 | CTGCATT     | C   | 87.26.1  | 92.2.16  | 9.78888 |
| LG15 | 3679601  | A           | G   | 7.4.45   | 44.17.19 | 9.40627 |
| LG15 | 3678656  | A           | T   | 69.43.0  | 22.78.7  | 9.37882 |
| LG11 | 11883036 | G           | A   | 36.52.26 | 2.61.49  | 9.09066 |
| LG11 | 11888226 | A           | G   | 25.55.34 | 0.47.65  | 8.91614 |
| LG11 | 11882287 | G           | T   | 36.58.20 | 5.56.51  | 8.62599 |
| LG15 | 3679328  | G           | A   | 62.1.2   | 32.13.19 | 8.57741 |
| LG11 | 11909716 | A           | G   | 3.31.80  | 13.65.34 | 8.48892 |
| LG11 | 11884966 | A           | G   | 33.58.23 | 64.48.0  | 8.47224 |
| LG15 | 3679314  | T           | A   | 63.1.2   | 34.14.18 | 8.36562 |
| LG11 | 11888804 | C           | T   | 38.48.28 | 69.42.1  | 8.35301 |
| LG11 | 11897707 | A           | G   | 0.0.5    | 82.27.0  | 8.16673 |
| LG11 | 11884428 | G           | T   | 34.57.23 | 63.49.0  | 8.09162 |
| LG11 | 11887651 | C           | T   | 35.57.22 | 65.47.0  | 7.9914  |
| LG08 | 24118526 | T           | G   | 26.0.1   | 15.10.26 | 7.94885 |
| LG08 | 1784484  | G           | T   | 10.76.28 | 8.100.2  | 7.93517 |
| LG08 | 1784427  | A           | G   | 36.44.0  | 10.95.1  | 7.89143 |
| LG11 | 11889859 | A           | C   | 27.54.33 | 2.45.65  | 7.58403 |
| LG08 | 24118524 | C           | A   | 26.0.1   | 16.10.26 | 7.54607 |
| LG08 | 24118777 | T           | G   | 19.3.4   | 9.12.45  | 7.06808 |
| LG11 | 11910235 | T           | A   | 5.37.72  | 13.69.30 | 7.00358 |
| LG15 | 3679420  | T           | C   | 49.11.13 | 17.32.34 | 6.99268 |
| LG11 | 11884616 | G           | T   | 35.56.23 | 52.59.0  | 6.91578 |
| LG11 | 11918378 | A           | T   | 104.10.0 | 69.40.2  | 6.89757 |

**Supplementary Table 3.** Sample location, date and number of Atlantic cod (*Gadus morhua*) specimens (♂ and ♀) used in this study.

| Sample Location | Year | No. of specimens | Males | Females |
|-----------------|------|------------------|-------|---------|
| Iceland         | 2003 | 22               | 12    | 10      |
| Lofoten, Norway | 2011 | 48               | 21    | 27      |
| Lofoten, Norway | 2014 | 50               | 23    | 27      |
| Averøya, Norway | 2014 | 59               | 32    | 27      |
| Sorøya, Norway  | 2014 | 48               | 22    | 26      |
| Total           |      | 227              | 110   | 117     |
